# Supplementary material
Source: Springer Nature journal article supplement (https://www.springermedizin.de/resource/supplementary/12939_2011_228_MOESM7_ESM.pdf/9550648)
Supplement: MOESM7 [file 9550648]

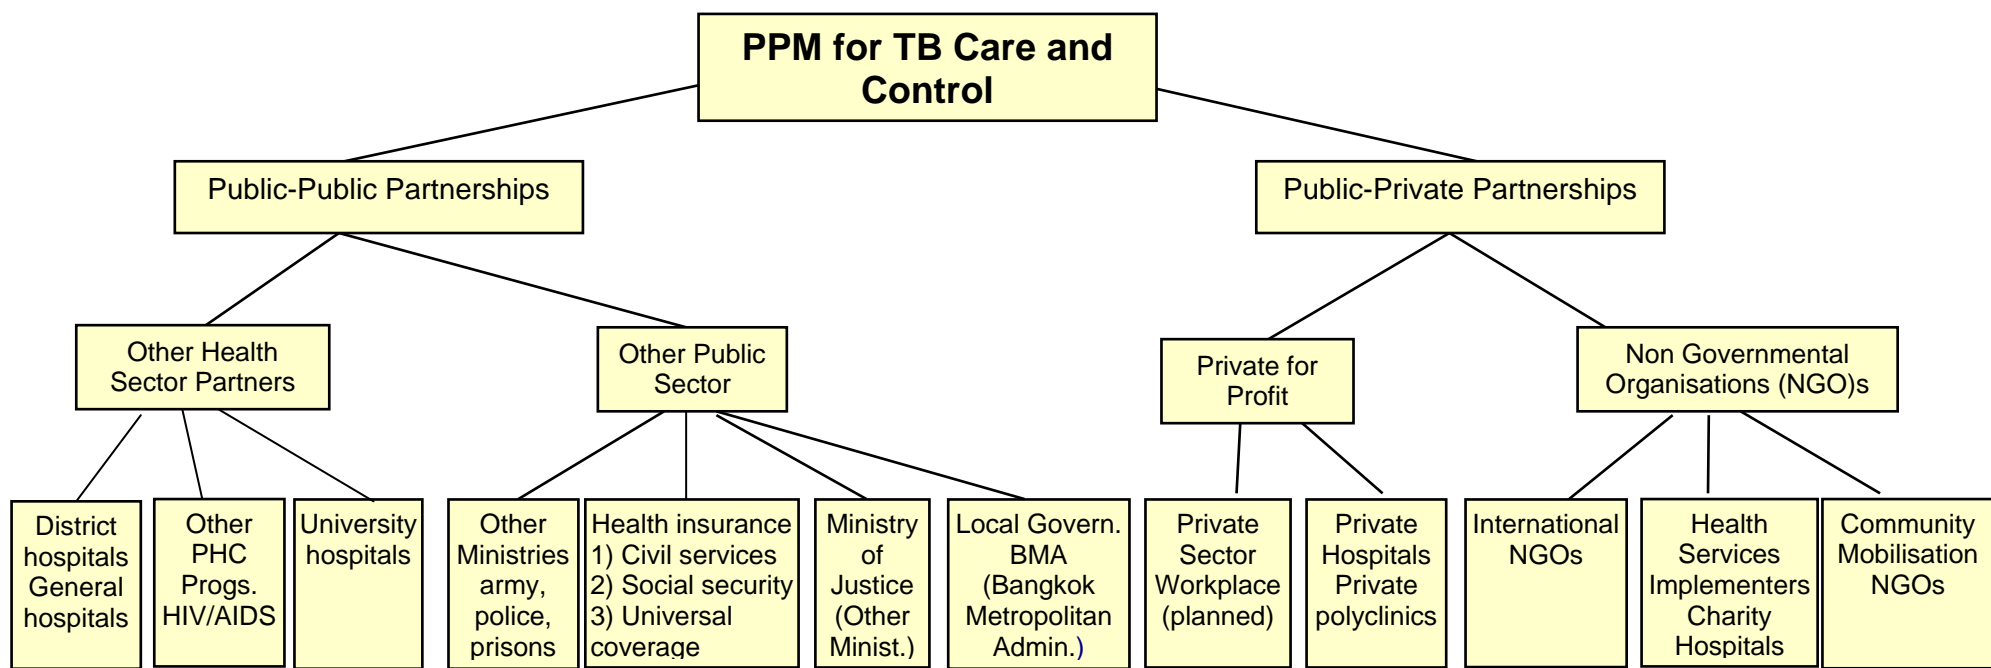

| Partner:                  | Other Health Sector Partners | Other Public Sector | Private for Profit | Non Governmental Organisations (NGO)s |
|---------------------------|------------------------------|---------------------|--------------------|---------------------------------------|
| Advocacy                  |                              | ✓                   |                    | ✓                                     |
| Cost coverage             |                              | ✓                   | ✓                  |                                       |
| Diagnosis                 | ✓                            | ✓                   |                    | ✓                                     |
| Referral                  |                              | ✓                   |                    | ✓                                     |
| Report                    | ✓                            | ✓                   | ✓                  | ✓                                     |
| Treatment                 | ✓                            | ✓                   | ✓                  | ✓                                     |
| Treatment support         |                              |                     |                    | ✓                                     |
| <u>NTP:</u>               |                              |                     |                    |                                       |
| Drugs                     | ✓                            | ✓                   | ✓                  | ✓                                     |
| Lab equipment             |                              |                     | ✓                  |                                       |
| IEC <sup>a</sup> Material |                              |                     | ✓                  |                                       |
| Supervision               | ✓                            | ✓                   |                    |                                       |
| Training                  |                              |                     | ✓                  |                                       |
